# Supplementary material for: Association of Job Expectations Among High School Students With Early Death During Adulthood
Source: PubMed Central journal article supplement (PMC7709084; doi:10.1001/jamanetworkopen.2020.27958), 2020-12-01
Supplement: jamanetwopen-e2027958-s001.pdf [file jamanetwopen-e2027958-s001.pdf]

## Supplemental Online Content

Muller C, Duncombe A, Carroll JM, Mueller AS, Warren JR, Grodsky E. Association of job expectations among high school students with early death during adulthood. *JAMA Netw Open*. 2020;3(12):e2027958. doi:10.1001/jamanetworkopen.2020.27958

**eTable 1.** Occupation Categories and Change in Labor Market Share and Wage Percentile Rank Between 1980 and 1990

**eTable 2.** *P* Values for Logistic and Ordinary Least Squares Regression Significance Testing of Differences in Descriptive Statistics

This supplemental material has been provided by the authors to give readers additional information about their work.

**eTable 1. Occupation Categories and Change in Labor Market Share and Wage Percentile Rank Between 1980 and 1990**

| <i>Analytic Occupational Categories</i> | <i>HS&amp;B Questionnaire Categories</i> | <i>% of HS&amp;B Sample<sup>a</sup></i> | <i>Most Common Occupations</i> | <i>% Male Workers<sup>b</sup></i> | <i>% Change in Labor Market Share<sup>b</sup></i> | <i>Wage Percentile Change<sup>b</sup></i> |
|-----------------------------------------|------------------------------------------|-----------------------------------------|--------------------------------|-----------------------------------|---------------------------------------------------|-------------------------------------------|
| <b>Declining</b><br>(Subbaccalaureate)  | Clerical                                 | 1.24%                                   | Secretary, Shipping Clerk      | 21.30%                            | -5.50%                                            | 2.42                                      |
|                                         | Craftsman                                | 14.08%                                  | Carpenter, Mechanic            | 93.80%                            | -7.90%                                            | -3.92                                     |
|                                         | Farmer, Farm manager                     | 2.77%                                   | Farmer (owner)                 | 90.30%                            | -9.40%                                            | -0.68                                     |
|                                         | Laborer                                  | 3.20%                                   | Farmer laborer, Construction   | 82.50%                            | -8.50%                                            | -1.92                                     |
|                                         | Military                                 | 3.98%                                   | Military                       | 91.10%                            | -15.40%                                           | N/A                                       |
| <b>Increasing</b><br>(Subbaccalaureate) | Operative                                | 5.34%                                   | Drivers, Machine operator      | 70.40%                            | -17.20%                                           | -5.90                                     |
|                                         | Protective                               | 3.06%                                   | Police, Security               | 88.60%                            | 11.60%                                            | 5.83                                      |
|                                         | Service                                  | 0.69%                                   | Janitor, Waitress/Waiter       | 35.90%                            | 0.50%                                             | 0.23                                      |
|                                         | Technical                                | 12.36%                                  | Drafter, Technician            | 59.40%                            | 16.30%                                            | 2.83                                      |
|                                         | Sales                                    | 1.70%                                   | Salesperson                    | 48.40%                            | 3.30%                                             | 7.79                                      |
| <b>Professional</b><br>(Baccalaureate)  | Manager, admin                           | 7.62%                                   | Manager, Administrator         | 73.90%                            | 2.30%                                             | 3.60                                      |
|                                         | Professional 1                           | 25.23%                                  | Accountant, Nurse              | 54.10%                            | 16.30%                                            | 5.66                                      |
|                                         | Professional 2                           | 11.98%                                  | Lawyer, Doctor                 | 75.30%                            | 21.80%                                            | 1.45                                      |
|                                         | School Teacher                           | 1.36%                                   | Primary School Teacher         | 29.20%                            | 5.30%                                             | 2.83                                      |
|                                         | Proprietor                               | 5.39%                                   | N/A                            | N/A                               | N/A                                               | N/A                                       |

<sup>a</sup>SOURCE: US Department of Education, National Center for Education Statistics, High School & Beyond (HS&B) Panel Sample Men Matched to Mortality Records

<sup>b</sup>SOURCE: 1980 & 1990 American Community Survey, working population

**Table 2. P-values for Logistic and OLS regression significance testing of differences in descriptive statistics (Table 1)**

|                                   | P-Values from comparison to distribution of those who survived to midlife |                   |                  |       |        |       |
|-----------------------------------|---------------------------------------------------------------------------|-------------------|------------------|-------|--------|-------|
|                                   | Suicide                                                                   | Drug<br>Poisoning | Disease          |       |        | Other |
|                                   |                                                                           |                   | Chronic<br>Liver | Heart | Cancer |       |
| Occupational Expectations         |                                                                           |                   |                  |       |        |       |
| Subbaccalaureate                  |                                                                           |                   |                  |       |        |       |
| Declining                         | 0.02                                                                      | 0.04              | 0.81             | 0.02  | 0.73   | 0.20  |
| Increasing                        | 0.88                                                                      | 0.63              | 0.42             | 0.45  | 0.88   | 0.55  |
| Professional                      | 0.03                                                                      | 0.13              | 0.42             | 0.10  | 0.67   | 0.42  |
| No Advanced Math                  | 0.05                                                                      | 0.01              | 0.06             | 0.007 | 0.000  | 0.001 |
| Test Scores <sup>a</sup>          | 0.65                                                                      | 0.37              | 0.72             | 0.000 | 0.18   | 0.000 |
| Church Attendance                 | 0.70                                                                      | 0.04              | 0.83             | 0.37  | 0.14   | 0.66  |
| Overweight                        | 0.59                                                                      | 0.97              | 0.81             | 0.001 | 0.04   | 0.07  |
| Depressive Thoughts               | 0.24                                                                      | 0.67              | 0.99             | 0.75  | 0.78   | 0.05  |
| Locus of Control <sup>a</sup>     | 0.85                                                                      | 0.04              | 0.93             | 0.56  | 0.71   | 0.07  |
| Parents' Highest Education        |                                                                           |                   |                  |       |        |       |
| High School                       | 0.53                                                                      | 0.03              | 0.08             | 0.43  | 0.34   | 0.02  |
| Some College or Vocational School | 0.95                                                                      | 0.32              | 0.18             | 0.69  | 0.14   | 0.62  |
| Bachelor's degree                 | 0.55                                                                      | 0.23              | 0.005            | 0.63  | 0.009  | 0.02  |
| Race                              |                                                                           |                   |                  |       |        |       |
| Non-Hispanic                      |                                                                           |                   |                  |       |        |       |
| White                             | 0.37                                                                      | 0.45              | 0.20             | 0.28  | 0.75   | 0.000 |
| Black                             | 0.69                                                                      | 0.89              | 0.40             | 0.03  | 0.80   | 0.02  |
| Hispanic                          | 0.39                                                                      | 0.14              | 0.04             | 0.76  | 0.25   | 0.001 |
| Other                             | 0.81                                                                      | 0.22              | 0.83             | 0.56  | 0.48   | 0.14  |
| Urbanicity                        |                                                                           |                   |                  |       |        |       |
| Urban                             | 0.77                                                                      | 0.30              | 0.98             | 0.62  | 0.90   | 0.03  |
| Suburban                          | 0.83                                                                      | 0.02              | 0.22             | 0.06  | 0.33   | 0.16  |
| Rural                             | 0.99                                                                      | 0.08              | 0.19             | 0.15  | 0.37   | 0.59  |
| Educational Attainment            |                                                                           |                   |                  |       |        |       |
| High School                       | 0.73                                                                      | 0.04              | 0.46             | 0.20  | 0.86   | 0.004 |
| High School Diploma               | 0.91                                                                      | 0.37              | 0.66             | 0.46  | 0.18   | 0.28  |
| Some College or Vocational School | 0.11                                                                      | 0.45              | 0.90             | 0.40  | 0.49   | 0.27  |
| Bachelor's degree                 | 0.09                                                                      | 0.44              | 0.66             | 0.009 | 0.02   | 0.000 |
| Early Adult Occupation            |                                                                           |                   |                  |       |        |       |
| Subbaccalaureate                  |                                                                           |                   |                  |       |        |       |
| Declining                         | 0.10                                                                      | 0.52              | 0.28             | 0.49  | 0.75   | 0.12  |
| Increasing                        | 0.96                                                                      | 0.07              | - <sup>b</sup>   | 0.25  | 0.30   | 0.83  |
| Professional                      | 0.05                                                                      | 0.25              | 0.63             | 0.10  | 0.59   | 0.03  |
| Member of Senior Cohort           | 0.52                                                                      | 0.54              | 0.39             | 0.21  | 0.79   | 0.28  |

SOURCE: U.S. Department of Education, National Center for Education Statistics, High School & Beyond Panel Sample Men who survived to 1992, excluding those who had no occupational expectations and those who expected not to work at age 30, matched to mortality records

Abbreviations: DP, drug poisoning; CL, chronic liver

<sup>a</sup> modeled with OLS regression; <sup>b</sup> Among those who died by chronic liver disease, none worked in a professional occupation in early adulthood
